# Supplementary material for: Influenza Vaccination among Patients with Diabetes or Ischemic Heart Disease in Thailand: Coverage, Knowledge and Associated Factors
Source: MDPI journal article supplement (doi:10.3390/vaccines11040794), 2023-04-04
Supplement: s1 [file s1]

## Supplement 1

### Interviewing

The interview questions include four sections.

#### Part 1 – General information of participants

1. Sex  
☐ male ☐ female
2. Age ..... years old
3. What is your highest education level?  
☐ Lower than bachelor's degree  
☐ Bachelor's degree or higher
4. Do you have any comorbidities?  
Diabetes mellitus ☐ yes ☐ no  
Ischemic heart disease ☐ yes ☐ no  
Diabetes mellitus and ischemic heart disease ☐ yes ☐ no

#### Part 2 –Influenza vaccination

1. Have you ever received an influenza vaccine in the past year?  
☐ yes ☐ no

#### Part 3 – Influenza knowledge

Direction: Are these 11 items on the knowledge of influenza correct or not?

1. People who experience influenza will be able to spread the disease from the onset of symptoms.  
☐ yes ☐ no
2. Influenza is mainly spread from person to person through droplets produced while coughing or sneezing.  
☐ yes ☐ no
3. Influenza can be spread by sharing items with others such as bath towels, hand towels, food spoons, straws etc.  
☐ yes ☐ no
4. Influenza cannot be contacted by touching hands, mucus, saliva and contaminated items such as doorknobs, handrails, telephones, tables, chairs etc.  
☐ yes ☐ no
5. Transmission of influenza can be prevented mainly by wearing a face mask.  
☐ yes ☐ no
6. Frequent hand washing with soap and water can help prevent influenza.  
☐ yes ☐ no

7. Symptoms of influenza are the same as those of the common cold, e.g., high fever, muscle aches, cough, sore throat, runny nose, difficulty breathing, vomiting and diarrhea.  
☐ yes ☐ no
8. If you become sick with influenza, you don't need to take a break or stop studying.  
☐ yes ☐ no
9. People should see a doctor if the fever has not reduced after 48 hours of presenting flu symptoms.  
☐ yes ☐ no
10. People with medical conditions such as lung disease, asthma and diabetes need to see a doctor immediately if they have a cold.  
☐ yes ☐ no
11. Maintaining good health by exercising regularly, eating healthful food, and getting sufficient rest can help prevent influenza.  
☐ yes ☐ no

#### **Part 4 - Factors associated with influenza vaccination.**

Direction: Please answer each question based on your perceptions and experiences on influenza vaccination.

1. Are you aware that the heart disease and/or diabetes you have can cause you to be re-hospitalized or have an increased risk of death from the onset of the disease?  
☐ yes ☐ no
2. Are you aware of the advantages of seasonal influenza vaccination, such as preventing severe complications when influenza flare-ups occur?  
☐ yes ☐ no
3. Are you aware of the disadvantages/side effects of receiving the vaccine? For example, it may cause allergies, fever, chills, muscle pain at the vaccination site, etc..  
☐ yes ☐ no
4. Are you afraid of vaccine complications, such as side effects from getting the influenza vaccine?  
☐ yes ☐ no
5. Did you know that you have the right to receive free vaccination?  
☐ yes ☐ no
6. Do you need to be vaccinated against the flu?  
☐ yes ☐ no
7. Have you received a seasonal influenza vaccine in the past few years?  
☐ yes ☐ no

**Table S1.** Patients' knowledge score on influenza (n = 150)

| Knowledge score on influenza                                                                                                                                                    | Patients with correct answer    |                                        |         |
|---------------------------------------------------------------------------------------------------------------------------------------------------------------------------------|---------------------------------|----------------------------------------|---------|
|                                                                                                                                                                                 | Vaccinated<br>(n = 68)<br>n (%) | Not<br>vaccinated (n<br>= 82)<br>n (%) | p-value |
| 1. People who experienced influenza will be able to spread the disease from the onset of symptoms.                                                                              | 61 (89.7)                       | 69 (84.1)                              | 0.346   |
| 2. Influenza is mainly spread from person to person through droplets produced while coughing or sneezing.                                                                       | 65 (95.6)                       | 76 (92.7)                              | 0.512   |
| 3. Influenza can be spread by sharing items with others, such as bath towels, hand towels, food spoons, straws etc.                                                             | 62 (91.2)                       | 73 (89.0)                              | 0.787   |
| 4. Influenza cannot be contacted by touching hands, mucus, saliva and contaminated items such as doorknobs, handrails, telephones, tables, chairs etc.                          | 55 (80.9)                       | 61 (74.4)                              | 0.434   |
| 5. Transmission of influenza can be prevented mainly by wearing a face mask.                                                                                                    | 66 (97.1)                       | 81 (98.8)                              | 0.590   |
| 6. Frequent hand washing with soap and water can help prevent influenza.                                                                                                        | 65 (95.6)                       | 78 (95.1)                              | 1.000   |
| 7. Symptoms of influenza are the same as those of the common cold, e.g., high fever, muscle aches, cough, sore throat, runny nose, difficulty breathing, vomiting and diarrhea. | 48 (70.6)                       | 50 (61.0)                              | 0.233   |
| 8. If you become sick with influenza, you don't need to take a break or stop studying.                                                                                          | 52 (76.5)                       | 57 (69.5)                              | 0.364   |
| 9. People should see a doctor if the fever has not reduced after 48 hours of presenting flu symptoms.                                                                           | 67 (98.5)                       | 76 (92.7)                              | 0.128   |
| 10. People with medical conditions such as lung disease, asthma and diabetes need to see a doctor immediately if they have a cold.                                              | 66 (97.1)                       | 77 (93.9)                              | 0.457   |
| 11. Maintaining good health by exercising regularly, eating healthful food, and getting sufficient rest can help prevent influenza.                                             | 67 (98.5)                       | 80 (97.6)                              | 1.000   |
| Influenza knowledge score (total of 11)                                                                                                                                         | 9.91 ± 1.23                     | 9.49 ± 1.40                            | 0.056   |
| Score 10/11                                                                                                                                                                     | 49 (72.1)                       | 47 (57.3)                              | 0.087   |
| Score <10                                                                                                                                                                       | 19 (27.9)                       | 35 (42.7)                              |         |
